# Supplementary material for: Age × stage‐classified demographic analysis: a comprehensive approach
Source: PubMed Central journal article supplement (PMC6283253; doi:10.1002/ecm.1306), 2018-07-11
Supplement: ECM-88-560-s002.pdf [file ECM-88-560-s002.pdf]

**H. Caswell, C. de Vries, N. Hartemink, G. Roth, and S. F. van Daalen. Age × stage-classified demographic analysis: a comprehensive approach. *Ecological Monographs*. 2018.**

---

## **Data S1**

**Matlab code for the example presented in the paper.**

---

## **Authors**

Hal Caswell  
Institute for Biodiversity and Ecosystem Dynamics  
University of Amsterdam  
PO Box 94248  
1090 GE Amsterdam  
The Netherlands  
[h.caswell@uva.nl](mailto:h.caswell@uva.nl)

Charlotte de Vries  
Institute for Biodiversity and Ecosystem Dynamics  
University of Amsterdam  
PO Box 94248  
1090 GE Amsterdam  
The Netherlands  
[c.devries@uva.nl](mailto:c.devries@uva.nl)

Nienke Hartemink  
Institute for Biodiversity and Ecosystem Dynamics  
University of Amsterdam  
PO Box 94248  
1090 GE Amsterdam  
The Netherlands  
[nienke.hartemink@gmail.com](mailto:nienke.hartemink@gmail.com)

Gregory Roth  
Institute for Biodiversity and Ecosystem Dynamics  
University of Amsterdam  
PO Box 94248  
1090 GE Amsterdam  
The Netherlands

greg.roth51283@gmail.com

Silke F. van Daalen  
Institute for Biodiversity and Ecosystem Dynamics  
University of Amsterdam  
PO Box 94248  
1090 GE Amsterdam  
The Netherlands  
greg.roth51283@gmail.com

---

### **File list (files found within DataS1.zip)**

age\_stage\_model\_construction\_analyis\_example\_section\_only.m  
data\_example.mat  
Emat.m  
Qmat.m  
vecperm\_hyp.m

### **Description**

age\_stage\_model\_construction\_analyis\_example\_section\_only.m  
– the code used to generate the results and plots in the Example section

data\_example.mat – Matlab file containing input data

The following three files create matrices that are needed for the example calculations.

Emat.m  
Qmat.m  
vecperm\_hyp.m

---
